# Supplementary material for: Design of functionalised circular tandem repeat proteins with longer repeat topologies and enhanced subunit contact surfaces
Source: PubMed Central journal article supplement (PMC8556268; doi:10.1038/s42003-021-02766-y), 2021-10-29
Supplement: 42003_2021_2766_MOESM1_ESM.pdf [file 42003_2021_2766_MOESM1_ESM.pdf]

## SUPPLEMENTARY INFORMATION

### Supplemental Tables:

**Table S1. Coding sequences, translated protein sequences and figures for constructs in this study**

**Table S2. Binding of trimeric tcTRP Anti-SARS CoV2 VHH domains to SARS RBD**

### Supplemental Figures:

**Supplemental Figure S1 (Related to Figures 1, 3 and 4).** Expression and purification of tcTRP9 and tcTRP9<sub>3</sub>.

**Supplemental Figure S2 (related to Figures 1, 3 and 4).** Comparison of the dimensions and topology of a 9 repeat 'cTRP' (circular Tandem Repeat Protein as described in<sup>13</sup>) compared to a comparable 9 repeat 'tcTRP' (thick circular Tandem Repeat Protein) described in this study

**Supplemental Figure S3 (related to Figure 5).** Expression of tcTRP24<sub>6</sub> and tcTRP24<sub>8</sub> and purification of tcTRP24<sub>8</sub>.

**Supplemental Figure S4 (Related to Figure 6).** 2-D projections of tcTRP24<sub>8</sub>SS used for CryoEM reconstruction (Figure 5) validates the overall design and dimensions of that construct.

**Supplemental Figure S5 (Related to Figure 8 and Supplemental Table S2).** Representative binding sensorgrams for determination of kinetics of binding interactions and equilibrium dissociation constants ( $K_D$ ) for the interaction between homotrimeric tcTRP9<sub>3</sub>-VHH<sub>3</sub> constructs and SARS-CoV2 RBD.

**Table S1. Coding sequences, translated protein sequences and figures for constructs in this study**

**>tcTRP9 (Figures 1, 3, 4, S1, S2)**

ATGGCTAGCAGCCATCATCATCATCATAGCAGCGGCCTGGTGCCGCGCGGCAGCTCCATGGGCAACCTGGAAGTGGCAC  
TGAAAGCTCTGCAGATTCTGGTGAATGCGGCCTATGTTCTGGCGGAAATCGCCCGTGATCGCGGTAACGAAGAACTGCTGGAA  
AAAGCGGCTCGTCTGGCCGAAGAAGCGGCACGTGAGGCAGAAAGAAATGACAGTCAAGCTCGCAAAGAAGGCAACCTGGAAC  
TGGCGCTGAAAGCCCTGCAAATCTGGTCAATGCAGTTACGTGCTGGCAGAAATCGCTCGTGACCCGCGTAAATGAGGAGCTG  
CTGGA AAAAGCGGCCCTGGCAGAAGAAGCAGCTCGCCAGGCCGAAGAAATCGCGCGTCAAGCCCGTAAAGAAGGCAATC  
TGGAACTGGCCCTGAAAGCCCTGCAAATCCTGGTGAATGCGGCCTATGTCCTGGCCGAAATGCGCGCACCCGTGGCAATGAG  
GAATTACTGGA AAAAGCGGCAGCCTGGCCGAAGAAGCGGCCCGCAAGCCGAAGAAATCGCCCGCAGGCCCGTAAAGAA  
GGCAACTTAGAGCTGGCTCTGAAAGCGCTGCAAATCCTGGTGAATGCAGTTACGTTCTGGCCGAAATGCCCCGACCCGCG  
TAATGAGGAACCTTGGAAAAAGCCGACGTCTGGCCGAAGAAGCAGCTCGTCAAGCGGAAGAAATGCCCCGTAAGCCCGCA  
AGAAGGCAATTTAGAGCTGGCCCTGAAAGCGCTGCAGATTCTGGTCAATGCGGCCTATGTGCTGGCCGAAATGCGCGTGAC  
CGTGGAATGAGGAACTCTGGA AAAAGCGGCAGCTTTAGCCGAAGAAGCGGCCCGTCAAGCCGAAGAAATCGCTCGCCAGG  
CCCGAAAAGAAGGCAATTTAGAATTAGCTTTAAAAGCGCTGCAAATCCTGGTGAACGCGCTTACGTCCTGGCCGAAATGCCC  
GTGATCGCGGTAATGAGGAACACTGGA AAAAGCGGCCCGCCTGGCCGAAGAAGCAGCCCGTCAAGCGGAAAGAAATGCTCG  
CCAGGCCCGGAAAGGCAATTTGGAGCTGGCCCTGAAAGCACTGCAAATCCTGGTCAACGCGCGTACGTGCTGGCCGAA  
ATCGCGCGCACCCGTGGCAACGAGGATTATTAGAAAAGCGGCAGCTTTGCGGAAGAAGCGGCAGCCAGGCCGGAAGAA  
ATTGCGCGCCAGGCCAGAAAAGAAGGCAATCTTGAGCTGGCTCTGAAAGCTCTGCAAATCCTGGTCAATGCGGCCTACGTTCT  
GGCAGAAATCGCGCTGACCGCGGTAATGAAGAGTTACTGGA AAAAGCGCGCGCTTAGCCGAAGAAGCAGCGCGCCAAGCC  
GAAGAAATGCGCGTCAAGCAGTAAAGAAGGCAACCTTAGCTGGCACTGAAGCGTTACAAATCTGGTTAACGCGGCCTA  
TGTGCTGGCGGAAATCGCGCGCACCCGCGCAATGAGGAACTGTTAGAAAAGCGGCACGCTTAGCCGAAGAAGCGGCAGC  
TCAAGCCGAAGAAATGCTCGCCAAGCAGCAAGAAGGCTAA

**MASSHHHHHSSGLVPRGSSMGNLELALKALQILVNAAYVLA EIARDRGNEELLEKAARLAE EAARQAE EIARQARKEGNLELAL  
KALQILVNAAYVLA EIARDRGNEELLEKAARLAE EAARQAE EIARQARKEGNLELALKALQILVNAAYVLA EIARDRGNEELLEKAA  
RLAE EAARQAE EIARQARKEGNLELALKALQILVNAAYVLA EIARDRGNEELLEKAARLAE EAARQAE EIARQARKEGNLELALKA  
LQILVNAAYVLA EIARDRGNEELLEKAARLAE EAARQAE EIARQARKEGNLELALKALQILVNAAYVLA EIARDRGNEELLEKAARL  
AE EAARQAE EIARQARKEGNLELALKALQILVNAAYVLA EIARDRGNEELLEKAARLAE EAARQAE EIARQARKEGNLELALKALQ  
ILVNAAYVLA EIARDRGNEELLEKAARLAE EAARQAE EIARQARKEGNLELALKALQILVNAAYVLA EIARDRGNEELLEKAARLAE  
EAARQAE EIARQARKEG**

**>tcTRP9<sub>3</sub> (Figures 4, S1)**

ATGGCTAGCAGCCATCATCATCATCATAGCAGCGGCCTGGTGCCGCGCGGCAGCTCCATGGGCAACCTGGAAGTGGCAC  
TGAAAGCTCTGCAGATTCTGGTGAATGCGGCCTATGTTCTGGCGGAAATCGCCCGTGATCGCGGTAACGAAGAACTGCTGGAA  
AAAGCGGCTCGTCTGGCCGAAGAAGCGGCACGTGAGGCAGAAAGAAATGACAGTCAAGCTCGCAAAGAAGGCAACCTGGAAC  
TGGCGCTGAAAGCCCTGCAAATCTGGTCAATGCAGTTACGTGCTGGCAGAAATCGCTCGTGACCCGCGTAAATGAGGAGCTG  
CTGGA AAAAGCGGCACGTCTGGCCGAAGAAGCAGCTCGTCAAGCCCGAAGAAATCGCGCGTCAAGCCCGTAAAGAAGGCAATC  
TGGAACTGGCCCTGAAAGCCCTGCAAATCCTGGTGAATGCGGCCTATGTCCTGGCAGAAATCGCGCGCACCCGTGGCAATGA  
GGAATTA CTGGA AAAAGCGGCCCGCCTGGCCGAAGAAGCGGCCCGTCAAGCCGAAGAAATGCCCCGTAAGCAGCAAAGAA  
GGCTAA

**MASSHHHHHSSGLVPRGSSMGNLELALKALQILVNAAYVLA EIARDRGNEELLEKAARLAE EAARQAE EIARQARKEGNLELAL  
KALQILVNAAYVLA EIARDRGNEELLEKAARLAE EAARQAE EIARQARKEGNLELALKALQILVNAAYVLA EIARDRGNEELLEKAA  
RLAE EAARQAE EIARQARKEG**

**>tcTRP24<sub>6</sub> (Figure 2, 3, S3)**

ATGGCTAGCAGCCATCATCATCATCATAGCAGCGGCCTGGTGCCGCGCGGCAGCTCCATGGGTAACAGCGAGCTGGCGG  
CGCGTATCCTGATCATTCTGTTCCAGCAACTGGTGGAGCTGGCGCGTCTGGCGATTGAAAGCGGCAGCAGGAACTGCTGCG  
TCGTGTGAGCGAGTGGCTGGAGGAAGTTATCAAGGATATGCGTCTGTGTTGACAGGCGCTGCGTGAGGGTAACAGCGAA  
CTGGCGGCTCGTATCCTGATTCTGTTTCAGCAACTGGTTGAGCTGGCGCGTCTGGCGATAGAGAGCGGTGATGAAGAGTT  
ATTACGTCGTGTGAGCGAATGGCTGGAGGAAGTTATAAAGACATGCGTCTGTGTTGAGCAGGCGCTGCGCGAAGGTAACA  
GCAACTGGCGGCACGTATCCTGATAATTCTGTTTCAACAACCTGGTGGAGCTGGCGCGTCTGGCGATCGAGAGCGGTGATGAA  
GAATTATTACGTCGTGTGAGCGAGTGGCTGGAGGAAGTTATAAAGACATGCGTCTGTGTTGAGCAGGCGCTGCGTGAAG  
GTAACAGCGAACTGGCGCGCGTATCCTGATAATTCTGTTCCAACAACCTGGTTGAGCTGGCGCGTCTGGCGATAGAAAGCGGT  
GATGAAGAGCTTTTACGTCGTGTGAGCGAGTGGCTGGAGGAAGTTATAAAGGACATGCGTCTGTGTTGAGCAGGCGCTGCG  
CGAGGTAACAGCGAACTGGCGGCCATCCTGATAATTCTGTTCCAGCAACTGGTGGAGCTGGCGCGTCTGGCGATCGAGAGCGGTGATGAA  
CTGGTGTGAAAGAGTTACTTCTGTCGTGTGAGCGAGTGGCTGGAGGAAGTTATAAAGGATATGCGTCTGTGTTGTAACAGGCG  
CTGCGCGAGGGTAACAGCGAACTGGCGGCACGTATCCTGATCATTCTGTTTCAGCAACTGGTTGAGCTGGCGCGTCTGGCGAT  
AGAAAGTGGTGTGATGAAGAGCTTCTTCTGTCGTGTGAGCGAGTGGCTGGAGGAAGTTATAAAGGATATGCGTCTGTGATGTTGAGC  
AGGCGCTGCGTGAGGGCTAA

**MASSHHHHHSSGLVPRGSSMGNSELAARILILFQQLVELARLAIESGDELLRRVSEWLEEVIKDMRRVVEQALREGNSELAARI  
LILFQQLVELARLAIESGDELLRRVSEWLEEVIKDMRRVVEQALREGNSELAARILILFQQLVELARLAIESGDELLRRVSEWLE  
EVIKDMRRVVEQALREGNSELAARILILFQQLVELARLAIESGDELLRRVSEWLEEVIKDMRRVVEQALREGNSELAARILILFQ  
LVELARLAIESGDELLRRVSEWLEEVIKDMRRVVEQALREGNSELAARILILFQQLVELARLAIESGDELLRRVSEWLEEVIKDM  
RRVVEQALREG**

**>tcTRP24<sub>8</sub> (Figures 2, 3, 5, 6, S3)**

ATGGCTAGCAGCCATCATCATCATCATATAGCAGCGGCCTGGTGCCGCGCGGCAGCTCCATGGGTAACAGCGAGCTGGCGG  
CGCGTATCCTGATCATTCTGTTCCAGCAACTGGTGGAGCTGGCGCGTCTGGCGATTGAAAGCGGCGACGAGGAAGCTGCTGCG  
TCGTGTGAGCGAGTGCTGGAGGAAGTTATCAAGGATATGCGTCGTGTGGTTGAACAGGCGCTGCGTGAGGGTAACAGCGAA  
CTGGCGGCTCGTATCCTGATTATTCTGTTTCAGCAACTGGTTGAGCTGGCGCGTCTGGCGATAGAGAGCGGTGATGAAGAGTT  
ATTACGTCGTGTGAGCGAATGGCTGGAGGAAGTTATAAAGACATGCGTCGTGTTGTGGAGCAGGCGCTGCGCAAGGTAACA  
GCGAACTGGCGGACGATCCTGATAATTCTGTTTCAACAACCTGGTGGAGCTGGCGCGTCTGGCGATCGAGAGCGGTGATGAA  
GAATTATTACGTCGTGTGAGCGAGTGGCTGGAGGAAGTTATAAAGACATGCGTCGTGTGGTGGAGCAGGCGCTGCGTGAAG  
GTAACAGCGAACTGGCGGCGCGTATCCTGATAATTCTGTTCCAACAACCTGGTTGAGCTGGCGCGTCTGGCGATAGAAAGCGGT  
GATGAAGAGCTTTTACGTCGTGTGAGCGAGTGGCTGGAGGAAGTTATAAAGGACATGCGTCGTGTTGTTGAGCAGGCGCTGCG  
CGAGGGTAACAGCGAACTGGCGGCGGATCCTGATAATTCTGTTCCAGCAACTGGTGGAGCTGGCGCGTCTGGCGATAGAA  
CTGGTGATGAAGAGTTACTTCGTGTCGTGTGAGCGAGTGGCTGGAGGAAGTTATAAAGGATATGCGTCGTGTTGTGGAACAGGCG  
CTGGCGGAGGGTAACAGCGAACTGGCGGCACGTATCCTGATCATTCTGTTTCAGCAACTGGTTGAGCTGGCGCGTCTGGCGAT  
AGAAAGTGGTATGAAGAGCTTCTTCGTGTCGTGTGAGCGAGTGGCTGGAGGAAGTTATAAAGGATATGCGTCGTGTAGTGGAGC  
AGCGGCTGCGAGGTAACAGCGAACTGGCGGCACGTATCCTGATTATTCTGTTCCAGCAACTGGTGGAGCTGGCGCGTCTGGCGAT  
GGCGATAGAAAGTGGGGATGAAGAGTTACTCCGTCGTGTGAGCGAGTGGCTGGAGGAAGTTATAAAGGATATGCGTCGTGTGTC  
GTGGAGCAGGCGCTGCGGGAGGGTAACAGCGAACTGGCGGCACGTATCCTGATAATTCTGTTCCAGCAACTGGTTGAGCTGG  
CGCGTCTGGCGATAGAAAGTGGCGATGAAGAGTTACTACGTCGTGTGAGCGAGTGGCTGGAGGAAGTTATAAAGGATATGCGT  
CGGTAGTAGAAGCAGGCGCTGCGGAGGGTTAA

**MASSHHHHHSSGLVPRGSSMGNSELAARILILFQQLVELARLAIESGDEELLRRVSEWLEEVIKDMRRVVEQALREGNSELAARI  
LILFQQLVELARLAIESGDEELLRRVSEWLEEVIKDMRRVVEQALREGNSELAARILILFQQLVELARLAIESGDEELLRRVSEWLE  
EVIKDMRRVVEQALREGNSELAARILILFQQLVELARLAIESGDEELLRRVSEWLEEVIKDMRRVVEQALREGNSELAARILILFQ  
LVELARLAIESGDEELLRRVSEWLEEVIKDMRRVVEQALREGNSELAARILILFQQLVELARLAIESGDEELLRRVSEWLEEVIKDM  
RRVVEQALREGNSELAARILILFQQLVELARLAIESGDEELLRRVSEWLEEVIKDMRRVVEQALREGNSELAARILILFQQLVELAR  
LAIESGDEELLRRVSEWLEEVIKDMRRVVEQALREG\***

**>tcTRP24<sub>8</sub>SS (Figures 5, 6, S4)**

ATGGCTAGCAGCCATCATCATCATCATATAGCAGCGGCCTGGTGCCGCGCGGCAGCTCCATGGGTAATAGCGAACTGGCGG  
CGCGTTCCTGATTATCCTGTTCCAGCAACTGGTGGAACTGGCGCGTCTGGCGATTGAGAGCGCGATGAGGAAGCTGCTGCGT  
CGTGTGAGCGAGTGCTGGAGGAAGTTATAAAGACATGCGTCGTGTGGTTGAGCAAGCGCTGCGTGAGGGTAACAGCGAGC  
TGCGGCGCGCATCCTGATCATTCTGTTCCAGCAACTGGTGGAGCTGGCGCGCCTGGCGATCGAAAGCGGCGACGAAGAGTT  
ATTACGTCGTGTGAGCGAATGGCTGGAGGAAGTTATCAAGGATATGCGTCGTGTGGTTGAACAAGCGCTGCGCGAAGGTAACA  
GCGAACTGGCGGCGCGCATTCTGATCATTCTGTTTCAGCAACTGGTTGAGCTGGCGCGTCTGGCGATCGAGAGCGGTGACGA  
AGAGTTACTTTCGTGTCGTGTGAGCGAGTGGTTAGAGGAAGTTATAAAGGATATGCGTCGTGTTGTGGAGCAAGCGCTGCGCGAAG  
GCAATAGCGAGCTGGCGGCGCGTATTCTGATTATCCTGTTCCAACAACCTGGTGGAGTTAGCTCGTCTGGCGATTGAAAGCGGC  
GACGAAGAATTATTACGTCGTGTGAGCGAGTGGCTAGAGGAAGTTATAAAGGACATGCGTCGTGTTGTTGAACAAGCGCTGCG  
TGAAGGCAACTCTGAGCTGGCGGCGCGTATCCTGATTATTCTGTTCCAACAACCTGGTTGAGTTAGCTCGCTGCGCTGGCGATTGAGA  
GCGGTGACGAAGAATTACTTCTGTCGTGTGAGCGAGTGGCTGAGGAAGTTATAAAGGATATGCGTCGTGTTGTTGAGCAGGCG  
CTGGCGGAAGGCAACAGTGAATTAGCTGCGCGTATTCTGATTATTCTGTTTCAACAACCTGGTGGAGCTTGTGCGCTGGCGATC  
GAGAGCGGCGACGAAGAGCTTTTACGTCGTGTGAGCGAGTGGCTCGAGGAAGTTATAAAGGATATGCGTCGTGTGGTGGAGC  
AGGCGCTGCGCGAGGGCAATTCTGAGTTAGCTGCGCGCATTTAATTATCTTATTCCAGCAACTGGTTGAGTTAGCGCGCTGG  
CGATTGAAAGCGGTCAGCAAGAGCTTCTTCGTGTCGTGTGAGCGAGTGGCTGAGGAAGTTATAAAGGATATGCGTCGTGCGTGT  
GAGCAGGCGCTGCGTGAAGGCAATAGCGAACTGGCGTGCCTGATTCTGATCATCCTTTTTCAGCAACTGGTGGAGTTAGCGCG  
TCTGGCGATCGAAAGCGGTGATGAAGAGCTGCTGCGTCGTGTTAGCGAGTGGCTGGAAGAAGTTATCAAGGACATGCGTCGT  
GTGGTGAACAGGCGCTGCGTGAGGGTTAA

**MASSHHHHHSSGLVPRGSSMGNSELAARLILFQQLVELARLAIESGDEELLRRVSEWLEEVIKDMRRVVEQALREGNSELAAR  
ILILFQQLVELARLAIESGDEELLRRVSEWLEEVIKDMRRVVEQALREGNSELAARILILFQQLVELARLAIESGDEELLRRVSEWLE  
EVIKDMRRVVEQALREGNSELAARILILFQQLVELARLAIESGDEELLRRVSEWLEEVIKDMRRVVEQALREGNSELAARILILFQ  
LVELARLAIESGDEELLRRVSEWLEEVIKDMRRVVEQALREGNSELAARILILFQQLVELARLAIESGDEELLRRVSEWLEEVIKDM  
RRVVEQALREGNSELAARILILFQQLVELARLAIESGDEELLRRVSEWLEEVIKDMRRVVEQALREGNSELAARILILFQQLVELAR  
LAIESGDEELLRRVSEWLEEVIKDMRRVVEQALREG\***

**>tcTRP24<sub>8</sub>SS-Cap (Figure 5)**

ATGGCTAGCAGCCATCATCATCATCATATAGCAGCGGCCTGGTGCCGCGCGGCAGCTCCATGGGTTGGTAACAGCGAGGAAG  
CGGCGCGTAAGCTGATCATTCTGTTCCAGCAACTGGTGGAGAAAGCGCGTAAGGCGATTGAAAGCGGCGACGAGGAAGAGCT  
GCGTCGTGTGAGCGAGGAAGTTATCAAGGATATGCGTCGTGTGGTTGAACAGGCGCTGCGTGAGGGTAACAGC  
GAACTGGCGGCTCGTATCCTGATTATTCTGTTTCAGCAACTGGTTGAGCTGGCGCGTCTGGCGATAGAGAGCGGTGATGAAGA  
GTTATTACGTCGTGTGAGCGAATGGCTGGAGGAAGTTATAAAGACATGCGTCGTGTTGTGGAGCAGGCGCTGCGCGAAGGTA  
ACAGCGAACTGGCGGACGATCCTGATAATTCTGTTTCAACAACCTGGTGGAGCTGGCGCGTCTGGCGATCGAGAGCGGTGAT  
GAAGAATTATTACGTCGTGTGAGCGAGTGGCTGGAGGAAGTTATAAAGACATGCGTCGTGTGGTGGAGCAGGCGCTGCGTGA  
AGGTAACAGCGAACTGGCGGCGCGTATCCTGATAATTCTGTTCCAACAACCTGGTTGAGCTGGCGCGTCTGGCGATAGAAAGCG  
GTGATGAAGAGCTTTTACGTCGTGTGAGCGAGTGGCTGGAGGAAGTTATAAAGGACATGCGTCGTGTTGTTGAGCAGGCGCTG  
CGGAGGGTAACAGCGAACTGGCGGCGGATCCTGATAATTCTGTTCCAGCAACTGGTGGAGCTGGCGCGTCTGGCGATAGAA  
AATCTGGTGATGAAGAGTTACTTCGTGTCGTGTGAGCGAGTGGCTGGAGGAAGTTATAAAGGATATGCGTCGTGTTGTGGAACAG  
GCGCTGCGCGAGGGTAACAGCGAACTGGCGGCACGTATCCTGATCATTCTGTTTCAGCAACTGGTTGAGCTGGCGCGTCTGG  
CGATAGAAAGTGGTATGAAGAGCTTCTTCGTGTCGTGTGAGCGAGTGGCTGGAGGAAGTTATAAAGGATATGCGTCGTGATGT  
GAGCAGGCGCTGCGAGAGGGTAACAGCGAACTGGCGGCACGTATCCTGATTATTCTGTTCCAGCAACTGGTGGAGCTGGCGCG  
GTCTGGCGATAGAAAGTGGGATGAAGAGTTACTCCGTCGTGTGAGCGAGTGGCTGGAGGAAGTTATAAAGGATATGCGTCGT  
GTCGTGGAGCAGGCGCTGCGGGAGGGTAACAGCGAACTGGCGGCACGTATCCTGGAGATTCTGTTCCAGCAACTGGTTGAGC

TGGCGCTCTGGCGAAGGAAAGTGGCGATGAAGAGTTACTACGTCGTGTGAGCGAGTGGCTGGAGGAAGTTAAGAAGGATAT  
GCGTCGTGTAGAGAACAGGCGAAACGCGAGGGTATTATATAA

MASSHHHHHSSGLVPRGSSMGNSEEAARKLILFQQLVEKARKAIESGDEEELRRVSEELVVIKDMRRVVEQALREGNSELAAR  
RILILFQQLVELARLAIESGDEELRRVSEWLEEVIKDMRRVVEQALREGNSELAARILILFQQLVELARLAIESGDEELRRVSEWL  
EEVIKDMRRVVEQALREGNSELAARILILFQQLVELARLAIESGDEELRRVSEWLEEVIKDMRRVVEQALREGNSELAARILILFQ  
QLVELARLAIESGDEELRRVSEWLEEVIKDMRRVVEQALREGNSELAARILILFQQLVELARLAIESGDEELRRVSEWLEEVIKD  
MRRVVEQALREGNSELAARILILFQQLVELARLAIESGDEELRRVSEWLEEVIKDMRRVVEQALREGNSELAARILEILFQQLVEL  
ARLAKESGDEELRRVSEWLEEVKDMRRVVEQAKREGII\*

>Free Nck SH2 (Figure 7)

ATGTCCGAGTGGTACTACGGGAACGTGACGCGGCCACAGGCCGAGTGCGCCCTCAACGAGCGGGGCGTGGAGGGCGACTTC  
CTCATTAGGACAGCGACTCCTCGCCACGCGACTTCCGCTGTCCCTAAAGCGTCAGGGAAGAACAACACTTCAAGGTGCA  
GCTCGTGACAAATGCTACTGGCAGCGCTTCACACCATGAGCGAGCAGTGGTGGAACTACAAAAAGGCGCCC  
ATCTTACCAGCGAGCAGCGGGAAGCTTACCTCGTCAGGGCCCTGCAGTGA

MSEWYYGNVTRHQAEALNERGVEGDFLIRDSESSPSDFSVSLKASGKNKHFVKVQLVDNVYICQRRFHTMDELVEHYKKAPIFT  
SEHGKLYLVRALQ\*

SH2 and VHH fusions to tcTRPs (inserted sequences are underlined; linker is *grey italicized*).

>tcTRP24<sub>8</sub>-SH2<sub>6</sub> (Figure 7)

ATGGCTAGCAGCCATCATCATCATCATAGCAGCGGCCTGGTGCCGCGCGGCGAGCTCCATGGGCAACAGCGAGCTGGCGG  
CGCGTATCCTGATCATTCTGTTCCAGCAACTGGTGGAGCTGGCGCGTCTGGCGATTGAAAGCGGTGACGAGGAACACTGCTCGCT  
CGTGTGAGCGAGTGGCTGGAGGAAGTTATCAAGGATATGCGTGTGGTTGAACAGGCGCTGCGTGAGGGTAACAGCGAAC  
TGGCTGCTCGTATCCTGATTATCCTGTTTCAAGCAACTGGTTGAGCTGGCGCGCCTGGCGATTGAAAGCGGCGATGAAGA  
TTACGTCGTGTGAGCGAATGGCTGGAGGAAGTTATTAAGACATGCGTGTGGTTGAGCAGGCGCTGCGTGAAGGTGGCG  
GTAGCGAGCGTACAGGATAAGGGTAGCGACGGCCAAGATAAAGGCGGTAGCGAGTGGTACTATGGCAACGTGACCCGTCACCA  
AGCGGAATGCGCGCTGAACGAGCGTGGTGGAGCTGGCTGCCTGGCGATCGAGAGCGGCGATGAGGAACACTGTACGTCGTG  
GTGAGCCTGAAGGCGAGCGGCAAGAACAACACTTCAAAGTGCAGCTGGTTGACAACGTGACTGCATCGGCCAACGTCGTTT  
TCACACGATGGAGGAGCTGGTTGAGCACTACAAGAAAGCGCCGATTTTACCAGCGAGCACGGTGAAAAGCTGTATCTGGTT  
GTGCGCTGAGGGCGGTAAGCGACGGTCAAGACAAGGTAGCGACGGCCAGGATAAAGGCAACAGCGAGCTGGCTGCTCGTA  
TCCTGATAAATCCTGTTTCAACAACACTGGTGGAGCTGGCTGCCTGGCGATCGAGAGCGGCGATGAGGAACACTGTACGTCGTG  
AGCGAGTGGCTGGAGGAAGTTATAAAGACATGCGTGTGGTGGAGCAAGCGCTGCGCGAAGGTAACAGCGAACTGGCCG  
CTCGTATCCTGATTATCTGTTTCAACAACACTGGTTGAGCTGGCTCGTCTGGCGATCGAGAGCGGTGATGAAGAACTGCTT  
GTGTGAGCGAGTGGCTGGAGGAAGTTATAAAGGACATGCGTGTGGTGGAGCAGGCGCTGCGCGAGGGTAACAGCGAACT  
GGCAGCGCTGATTATCTTATTTCAAGCAACTGGTGGAGCTGGCACGCCCTGGCGATCGAATCTGGTGATGAAGAACTGC  
TCCGTCGTGTGAGCGAGTGGCTGGAGGAAGTTATAAAGGATATGCGTGTGGTTGGAACAGGCGCTGCGCGAGGGTAACAG  
CGAACTGGCGGCTCGTATCCTGATCATCCTGTTCCAACAACACTGGTTGAGCTGGCACGCCCTGGCGATTGAGAGCGGCGATGAG  
GAACTGCTTCGTCGTGTGAGCGAGTGGCTGGAGGAAGTTATAAAGGATATGCGTGTGTAGTGAACAGGCGCTGCGTGAAG  
CGGCTGGCAGCGATGGCCAAGACAAGGGTAGCGATGGTCAAGATAAAGTGGCAGCGAATGGTATTACGGTAATGTTACCCG  
CCATCAGGCGAATGTCGCGCTGAATGAACGTGGTGGAGGTAAGTACTTCTGATTCCGCGACTCTGAAAAGCAGCCCTAGCGAC  
TTTAGCCTTAGCCTGAAGGCGAGCGGCAAAAACAACACTTTAAAGTTCAGCTGGTTGACAACGTTTATTGCATTGGTCAACGT  
CGTTTCCATACGATGGACGAGCTGGTTGAGCATTATAAGAAAGCGCCGATCTTACCAGCGAACATGGTGAAAACACTGTACCTG  
GTGCGTGCCTGCAGGGTGGCAGCGACGGTCAAGACAAGGTAGCGACGGTCAAGATAAAGGCAACAGCGAGCTGGCCGCT  
CGTATCCTGATAAATCTGTTTCAACAACACTGGTGGAGCTGGCCCGATTAGCGATCGAGAGCGGCGACGAAGAACTGTACCTG  
TGTGAGCGAGTGGCTGGAGGAAGTTATAAAGGATATGCGTGTGCGTTGAACAAGCGCTGCGAGAAGGTAACAGCGAACTG  
GCAGCACGATCCTGATAATATTATTTCAAGCAACTGGTTGAGCTGGCCCGTTAGCTATTGAAAGCGGCGACGAGGAACGTTA  
CGTCGTGTGAGCGAGTGGCTGGAGGAAGTTATAAAGGATATGCGTGTGTAGTAGAACAGGCGCTGCGCGAGGGTTAA

MASSHHHHHSSGLVPRGSSMGNSELAARILILFQQLVELARLAIESGDEELRRVSEWLEEVIKDMRRVVEQALREGNSELAAR  
LILFQQLVELARLAIESGDEELRRVSEWLEEVIKDMRRVVEQALREGNSELAARILILFQQLVELARLAIESGDEELRRVSEWL  
EEVIKDMRRVVEQALREGNSELAARILILFQQLVELARLAIESGDEELRRVSEWLEEVIKDMRRVVEQALREGNSELAARILILFQ  
QLVELARLAIESGDEELRRVSEWLEEVIKDMRRVVEQALREGNSELAARILILFQQLVELARLAIESGDEELRRVSEWLEEVIKD  
MRRVVEQALREGNSELAARILILFQQLVELARLAIESGDEELRRVSEWLEEVIKDMRRVVEQALREGNSELAARILILFQQLVELAR  
LAKESGDEELRRVSEWLEEVKDMRRVVEQAKREGII\*  
MASSHHHHHSSGLVPRGSSMGNSELAARILILFQQLVELARLAIESGDEELRRVSEWLEEVIKDMRRVVEQALREGNSELAAR  
LILFQQLVELARLAIESGDEELRRVSEWLEEVIKDMRRVVEQALREGNSELAARILILFQQLVELARLAIESGDEELRRVSEWL  
EEVIKDMRRVVEQALREGNSELAARILILFQQLVELARLAIESGDEELRRVSEWLEEVIKDMRRVVEQALREGNSELAARILILFQ  
QLVELARLAIESGDEELRRVSEWLEEVIKDMRRVVEQALREGNSELAARILILFQQLVELARLAIESGDEELRRVSEWLEEVIKD  
MRRVVEQALREGNSELAARILILFQQLVELARLAIESGDEELRRVSEWLEEVIKDMRRVVEQALREGNSELAARILILFQQLVELAR  
LAKESGDEELRRVSEWLEEVKDMRRVVEQAKREGII\*

>tcTRP9<sub>3</sub>-VHH678<sub>3</sub> (Figure 8)

ATGGGTAATCTTGAACCTTGCAATGAAAGCACTGCAAAATCTTGTGAATGCTGCTTATGTATTAGCTGAGATTGCACGCGATCGTG  
GCAACGAAGAATTGTTGGAGAAGGCGCGCTTCTGCTGAAGAAGCTGCCCGTCAAGCGGAAGAAATCGCGCGTCAAGGCTCG  
TAAGGAAGGCAATTTAGAGTTGGCGCTGAAAGCTTTCAGATTTTAGTAAACGCGGCGTACGTCTTGTGAGATCGCCCGTGA  
CCGCGGCAATGAGGAGCTTTTAGAGAAAGCGGACAGTCTTGCAGGAAAGCTGCGCGTCAAGCAGAAGAAATTCGCGGCCAA  
GCTCGTAAAGAAGGCAACTGGAGCTTGCATTAAGGCCCTTCAAATCCTGGTCAACGCTGCATATGTTCTGGCAGAAATGCG  
CGCGATCGCGAAATGAAGAAGTGGTGAAGAACGAGCGCGCTTGTGAGGAAGCAGCCGCCAGGCCGAGGAGATTGCC  
CGTCAGGCGCGCAAGGAAGGAAGCCCGCCCCCGCCCGCTGGACAAGTACAACCTCAAGAAAGCGGCGGTTGGTTGGTT

CAGGCGGGCGGCAGCCTTCGTTTGTCTGTGCCGCCTCTGGCCGTACCTTTAGTGAGTACGCAATGGGTTGGTTTCGCCAGG  
CCCCTGGTAAGGAACGTGAATTTGTTGCAACTATCTCATGGAGTGGTGGCTCTACTTATTACACCCGTTTCAGTAAAAAGGACGTTT  
CACTATCTCCCAGCAACGCGAAAAACACCGTCTACTTGCAAATGAATAGCCTGAAGCCCGACGATACAGCAGTATATTATTG  
CGCGGCAGCGGGTTAGGAACAGTAGTATCAGAGTGGGATTACGACTACGACTATTGGGGACAGGGCACTCAAGTAACAGTG  
TCAAGCGGACATCATCATCACCACCAC

**MGQVQLQESGGGLVQAGGSLRLSCAASGRFTFSEYAMGWFRQAPGKEREFVATISWSGGSTYYTRSVKGRFTISRDNKNTVYLQ**  
**MNSLKPDDTAVYYCAAAGLGTVVSEWDYDYDYWGQGTQVTVSS****EAAAKGGNLELALKALQILVNAAYVLAEIARDRGNEELLE**  
**KAARLAEAAARQAEEIARQARKEGNLELALKALQILVNAAYVLAEIARDRGNEELLEKAARLAEAAARQAEEIARQARKEGNLELA**  
**LKALQILVNAAYVLAEIARDRGNEELLEKAARLAEAAARQAEEIARQARKEGGHHHHHH**

**>tcTRP9<sub>3</sub>-VHH679<sub>3</sub> (Figure 8)**

ATGGGACAAGTACAACCTCAAGAAAGCGGCGGTGGGTTGGTTCAGGCGGGCGGCAGCCTTCGTTTGTCTGTGCCGCCTCTG  
GCCGTACCTTTAGTGAGTACGCAATGGGTTGGTTTCGCCAGGCCCTGGTAAGGAACGTGAATTTGTTGCAACTATCTCATGGA  
GTGGTGGCTCTACTTATTACACCCGTTTCAGTAAAAGGACGTTTCACTATCTCCCGCGACAACGCGAAAAACACCGTCTACTTGC  
AAATGAATAGCCTGAAGCCCGACGATACAGCAGTATATTATTGCGCGGCAGCGGGGTTAGGAACAGTAGTATCAGAGTGGGAT  
TACGACTACGACTATTGGGGACAGGGCACTCAAGTAACAGTGTCAAGCCCGGCCCGCCCGCTGGAGGTAATCTTGAAGT  
TGCATTGAAAGCACTGCAAAATCTTGTGAATGCTGCTTATGTATTAGCTGAGATTGCACGCGATCGTGGAACGAAGAATTGTTG  
GAGAAGGCGGCGCTTGTCTGAAGAAGCTGCCCGTCAAGCGGAAGAAATCGCGCGTCAGGCTCGTAAGGAAGGCAATTTAG  
AGTTGGCGCTGAAAGCTTTGCAGATTTTAGTAAACGCGGCTACGTCCTTGTGAGATCGCCCGTACCCGCGCAATGAGGAG  
CTTTTAGAGAAAGCGGCACGCTTTCGCGGAGGAAGCTGCGCGTCAGGCAGAAGAAATGCGCGCAAGCTCGTAAAGAAGGCA  
ACTTGGAGCTTGCATTAAGGCCCTTCAAATCCTGGTCAACGCTGCATATGTTCTGCGAGAAATGCGCGCGATCGCGAAATG  
AAGAAGTCTTGAAGAAGCAGCGCGCTTGTCTGAGGAAGCAGCCCGCCAGGCGGAGGAGATTGCCCGTCAGGCGCGCAAGG  
AAGGAGGACATCATCATCACCACCAC

**MGQVQLQESGGGLVQAGGSLRLSCAASGRFTFSEYAMGWFRQAPGKEREFVATISWSGGSTYYTRSVKGRFTISRDNKNTVYLQ**  
**MNSLKPDDTAVYYCAAAGLGTVVSEWDYDYDYWGQGTQVTVSS****PAPAPAGGNLELALKALQILVNAAYVLAEIARDRGNEELLE**  
**KAARLAEAAARQAEEIARQARKEGNLELALKALQILVNAAYVLAEIARDRGNEELLEKAARLAEAAARQAEEIARQARKEGNLELA**  
**LKALQILVNAAYVLAEIARDRGNEELLEKAARLAEAAARQAEEIARQARKEGGHHHHHH**

**>tcTRP9<sub>3</sub>-VHH680<sub>3</sub> (Figure 8)**

ATGGGACAAGTACAACCTCAAGAAAGCGGCGGTGGGTTGGTTCAGGCGGGCGGCAGCCTTCGTTTGTCTGTGCCGCCTCTG  
GCCGTACCTTTAGTGAGTACGCAATGGGTTGGTTTCGCCAGGCCCTGGTAAGGAACGTGAATTTGTTGCAACTATCTCATGGA  
GTGGTGGCTCTACTTATTACACCCGTTTCAGTAAAAGGACGTTTCACTATCTCCCGCGACAACGCGAAAAACACCGTCTACTTGC  
AAATGAATAGCCTGAAGCCCGACGATACAGCAGTATATTATTGCGCGGCAGCGGGGTTAGGAACAGTAGTATCAGAGTGGGAT  
TACGACTACGACTATTGGGGACAGGGCACTCAAGTAACAGTGTCAAGCGCACCTGAGTTTCTTGGGGGACCTGGAGGTAATCT  
TGAAGTTCGATTGAAAGCACTGCAAAATCTTGTGAATGCTGCTTATGTATTAGCTGAGATTGCACGCGATCGTGGAACGAAGA  
ATTGTTGGAGAAGGCGGCGCTTGTCTGAAGAAGCTGCCCGTCAAGCGGAAGAAATCGCGCGTCAGGCTCGTAAGGAAGGC  
AATTTAGAGTTGGCGCTGAAAGCTTTGCAGATTTTAGTAAACGCGGCGTACGTCCTTGTGAGATCGCCCGTACCCGCGCA  
TGAGGAGCTTTTAGAGAAAGCGGCACGCTTTCGCGGAGGAAGCTGCGCGTCAGGCAGAAGAAATGCGCGCAAGCTCGTAAA  
GAAGGCAACTTGGAGCTTGCATTAAGGCCCTTCAAATCCTGGTCAACGCTGCATATGTTCTGCGAGAAATGCGCGCGATCG  
CGGAAATGAAGAAGTCTTGAAGAAGCAGCGCGCTTGTCTGAGGAAGCAGCCCGCCAGGCGGAGGAGATTGCCCGTCAGGC  
GCGCAAGGAAGGAGGACATCATCATCACCACCAC

**MGQVQLQESGGGLVQAGGSLRLSCAASGRFTFSEYAMGWFRQAPGKEREFVATISWSGGSTYYTRSVKGRFTISRDNKNTVYLQ**  
**MNSLKPDDTAVYYCAAAGLGTVVSEWDYDYDYWGQGTQVTVSS****APFLGGPGGNLELALKALQILVNAAYVLAEIARDRGNEEL**  
**LEKAARLAEAAARQAEEIARQARKEGNLELALKALQILVNAAYVLAEIARDRGNEELLEKAARLAEAAARQAEEIARQARKEGNLE**  
**LALKALQILVNAAYVLAEIARDRGNEELLEKAARLAEAAARQAEEIARQARKEGGHHHHHH**

**>tcTRP9<sub>3</sub>-VHH681<sub>3</sub> (Figure 8)**

ATGGGACAAGTACAACCTCAAGAAAGCGGCGGTGGGTTGGTTCAGGCGGGCGGCAGCCTTCGTTTGTCTGTGCCGCCTCTG  
GCCGTACCTTTAGTGAGTACGCAATGGGTTGGTTTCGCCAGGCCCTGGTAAGGAACGTGAATTTGTTGCAACTATCTCATGGA  
GTGGTGGCTCTACTTATTACACCCGTTTCAGTAAAAGGACGTTTCACTATCTCCCGCGACAACGCGAAAAACACCGTCTACTTGC  
AAATGAATAGCCTGAAGCCCGACGATACAGCAGTATATTATTGCGCGGCAGCGGGGTTAGGAACAGTAGTATCAGAGTGGGAT  
TACGACTACGACTATTGGGGACAGGGCACTCAAGTAACAGTGTCAAGCGCCCGCCTCCCGTTCTTCAACCCCGCCACCC  
AAGTCCGTCAGCTGGAGGTAATCTTGAAGTTCGATTGAAAGCACTGCAAAATCTTGTGAATGCTGCTTATGTATTAGCTGAGATT  
GCACGAGTCTGGCAACGAAGAATTGTTGGAAGGCGGCGCTTGTCTGAAGAAGCTGCCCGTACCCGCGCAAGCGGAAGAAATCG  
CGCGTCAGGCTCGTAAGGAAGGCAATTTAGAGTTGGCGCTGAAAGCTTTGCAGATTTTAGTAAACGCGGCGTACGTCCTTGT  
GAGATCGCCCGTACCCGCGCAATGAGGAGCTTTAGAGAAAGCGGCACGCTTTCGCGGAGGAAGCTGCGCGTCAGGCAGAA  
GAAATGCGCGCAAGCTCGTAAAGAAGGCAACTTGGAGCTTGCATTAAGGCCCTTCAAATCCTGGTCAACGCTGCATATGTT  
CTGGCAGAAATGCGCGCGATCGCGGAAATGCGCGCGGAAATGAAGAAGTCTTGAAGAAGCAGCGCGCTTGTGAGGAAGCAGCCCGCAGG  
CGGAGGAGATTGCCCGTACCCGCGCAAGGAAGGAGGACATCATCATCACCACCAC

**MGQVQLQESGGGLVQAGGSLRLSCAASGRFTFSEYAMGWFRQAPGKEREFVATISWSGGSTYYTRSVKGRFTISRDNKNTVYLQ**  
**MNSLKPDDTAVYYCAAAGLGTVVSEWDYDYDYWGQGTQVTVSS****APPVPSTPPTSPSAGGNLELALKALQILVNAAYVLAEIAR**  
**DRGNEELLEKAARLAEAAARQAEEIARQARKEGNLELALKALQILVNAAYVLAEIARDRGNEELLEKAARLAEAAARQAEEIARQA**  
**RKEGNLELALKALQILVNAAYVLAEIARDRGNEELLEKAARLAEAAARQAEEIARQARKEGGHHHHHH**

**>tcTRP9<sub>3</sub>-VHH682<sub>3</sub> (Figure 8)**

ATGGGTAATCTTGAACCTGCATTGAAAGCACTGCAAATCTTGTGAATGCTGCTTATGTATTAGCTGAGATTGCACGCGATCGTG  
GCAACGAAGAATTGTTGGAGAAGGCGGCGCGTCTTGTGAAGAAGCTGCCCGTCAAGCGGAAGAAATCGCGCGTCAGGCTCG  
TAAGGAAGGCAATTTAGAGTTGGCGCTGAAAGCTTTGCAGATTTAGTAAACGCGGCGTACGTCTTGTGAGATCGCCCGTGA  
CCGCGGCAATGAGGAGCTTTTAGAGAAAAGCGGCACGTCTTGCAGGAGAAAGCTGCGCGTCAGGCAGAAGAAATTCGCGGCCAA  
GCTCGTAAAGAAGGCAACTTGGAGCTTGCATTAAGGCCCTTCAAATCCTGGTCAACGCTGCATATGTTCTGGCAGAAATTGCG  
CGCGATCGCGGAAATGAAGAAGTGCCTTGCATTAAGGCCCGCTTGCAGGAAAGCAGCCCGCCAGGCGGAGGAGATTGCC  
CGTCAGGCGCGCAAGGAAGGTGGACAAGTACAACCTCAAGAAAGCGGCGGTGGGTTGGTTCAGGCGGCGGCGCAGCCTTGT  
TGTCTGTGCCGCTCTGGCCGTACCTTTAGTGAGTACGCAATGGGTTGGTTTCCGACAGGCCCTGGTAAGGAACGTGAATTT  
GTTGCAACTATCTCATTGGAGTGGTGGCTCTACTTATTACACCCGTTCAAGTAAAGGACGTTTCACTATCTCCCGCAGAACGCG  
AAAAACACCGTCTACTTGCAAATGAATAGCCTGAAGCCGACGATACAGCAGTATATTATTGCGCGGACGCGGGTTAGGAAC  
AGTAGTATCAGAGTGGGATTACGACTACGACTATTGGGGACAGGGCACTCAAGTAAACAGTGTCAAGCGGACATCATCACC  
ACCAC

**MGNLELALKALQILVNAAYVLAIEARDRGNEELLEKAARLAEAAARQAEIARQARKEGNLELALKALQILVNAAYVLAIEARDRGN  
EELLEKAARLAEAAARQAEIARQARKEGNLELALKALQILVNAAYVLAIEARDRGNEELLEKAARLAEAAARQAEIARQARKEG  
QGVQLQESGGGLVQAGGSLRLSCAASGRTFSEYAMGWFRQAPGKEREFVATISWGGSTYYTRSVKGRFTISRDNKNTVYLQM  
NSLKPDDTAVYYCAAAGLGTVVSEWDYDYYWGGTQVTVSSGHHHHHH**

**>tcTRP9<sub>3</sub>-VHH683<sub>3</sub> (Figure 8)**

ATGGGTAATCTTGAACCTGCATTGAAAGCACTGCAAATCTTGTGAATGCTGCTTATGTATTAGCTGAGATTGCACGCGATCGTG  
GCAACGAAGAATTGTTGGAGAAGGCGGCGCGTCTTGTGAAGAAGCTGCCCGTCAAGCGGAAGAAATCGCGCGTCAGGCTCG  
TAAGGAAGGCAATTTAGAGTTGGCGCTGAAAGCTTTGCAGATTTAGTAAACGCGGCGTACGTCTTGTGAGATCGCCCGTGA  
CCGCGGCAATGAGGAGCTTTTAGAGAAAAGCGGCACGTCTTGCAGGAGAAAGCTGCGCGTCAGGCAGAAGAAATTCGCGGCCAA  
GCTCGTAAAGAAGGCAACTTGGAGCTTGCATTAAGGCCCTTCAAATCCTGGTCAACGCTGCATATGTTCTGGCAGAAATTGCG  
CGCGATCGCGGAAATGAAGAAGTGCCTTGCATTAAGGCCCGCTTGCAGGAAAGCAGCCCGCCAGGCGGAGGAGATTGCC  
CGTCAGGCGCGCAAGGAAGGAAGCGAGGCAGCCGCAAAGGGTGGACAAGTACAACCTCAAGAAAGCGGCGGTGGGTTGGT  
CAGGCGGGCGGCGCAGCCTTGTCTTGTCTGTGCCGCTCTGGCCGTACCTTTAGTGAGTACGCAATGGGTTGGTTTCCGCCAGG  
CCCCTGGTAAAGGAACGTGAATTTGTTGCAACTATCTCATGGAGTGGTGGCTCTACTTATTACACCCGTTCAAGTAAAGGACGTTT  
CACTATCTCCCGCAGAACGCGAAAAACACCGTCTACTTGCAAATGAATAGCCTGAAGCCCGACGATACAGCAGTATATTATTG  
CGCGGACGCGGGTTAGGAACAGTAGTATCAGAGTGGGATTACGACTACGACTATTGGGGACAGGGCACTCAAGTAAACAGT  
TCAAGCGGACATCATCACCACCAC

**MGNLELALKALQILVNAAYVLAIEARDRGNEELLEKAARLAEAAARQAEIARQARKEGNLELALKALQILVNAAYVLAIEARDRGN  
EELLEKAARLAEAAARQAEIARQARKEGNLELALKALQILVNAAYVLAIEARDRGNEELLEKAARLAEAAARQAEIARQARKEG  
SEAAAKGGQVQLQESGGGLVQAGGSLRLSCAASGRTFSEYAMGWFRQAPGKEREFVATISWGGSTYYTRSVKGRFTISRDNK  
KNTVYLQMNLSLKPDDTAVYYCAAAGLGTVVSEWDYDYYWGGTQVTVSSGHHHHHH**

**>tcTRP9<sub>3</sub>-VHH684<sub>3</sub> (Figure 8)**

ATGGGTAATCTTGAACCTGCATTGAAAGCACTGCAAATCTTGTGAATGCTGCTTATGTATTAGCTGAGATTGCACGCGATCGTG  
GCAACGAAGAATTGTTGGAGAAGGCGGCGCGTCTTGTGAAGAAGCTGCCCGTCAAGCGGAAGAAATCGCGCGTCAGGCTCG  
TAAGGAAGGCAATTTAGAGTTGGCGCTGAAAGCTTTGCAGATTTAGTAAACGCGGCGTACGTCTTGTGAGATCGCCCGTGA  
CCGCGGCAATGAGGAGCTTTTAGAGAAAAGCGGCACGTCTTGCAGGAGAAAGCTGCGCGTCAGGCAGAAGAAATTCGCGGCCAA  
GCTCGTAAAGAAGGCAACTTGGAGCTTGCATTAAGGCCCTTCAAATCCTGGTCAACGCTGCATATGTTCTGGCAGAAATTGCG  
CGCGATCGCGGAAATGAAGAAGTGCCTTGCATTAAGGCCCGCTTGCAGGAAAGCAGCCCGCCAGGCGGAGGAGATTGCC  
CGTCAGGCGCGCAAGGAAGGAAGCCCGGCCCCCGCCCCGCTGGACAAGTACAACCTCAAGAAAGCGGCGGTGGGTTGGT  
CAGGCGGGCGGCGCAGCCTTGTCTTGTCTGTGCCGCTCTGGCCGTACCTTTAGTGAGTACGCAATGGGTTGGTTTCCGCCAGG  
CCCCTGGTAAAGGAACGTGAATTTGTTGCAACTATCTCATGGAGTGGTGGCTCTACTTATTACACCCGTTCAAGTAAAGGACGTTT  
CACTATCTCCCGCAGAACGCGAAAAACACCGTCTACTTGCAAATGAATAGCCTGAAGCCCGACGATACAGCAGTATATTATTG  
CGCGGACGCGGGTTAGGAACAGTAGTATCAGAGTGGGATTACGACTACGACTATTGGGGACAGGGCACTCAAGTAAACAGT  
TCAAGCGGACATCATCACCACCAC

**MGNLELALKALQILVNAAYVLAIEARDRGNEELLEKAARLAEAAARQAEIARQARKEGNLELALKALQILVNAAYVLAIEARDRGN  
EELLEKAARLAEAAARQAEIARQARKEGNLELALKALQILVNAAYVLAIEARDRGNEELLEKAARLAEAAARQAEIARQARKEG  
SPAPAPAGQVQLQESGGGLVQAGGSLRLSCAASGRTFSEYAMGWFRQAPGKEREFVATISWGGSTYYTRSVKGRFTISRDNK  
NTVYLQMNLSLKPDDTAVYYCAAAGLGTVVSEWDYDYYWGGTQVTVSSGHHHHHH**

**>tcTRP9<sub>3</sub>-VHH686<sub>3</sub> (Figure 8)**

ATGGGTAATCTTGAACCTGCATTGAAAGCACTGCAAATCTTGTGAATGCTGCTTATGTATTAGCTGAGATTGCACGCGATCGTG  
GCAACGAAGAATTGTTGGAGAAGGCGGCGCGTCTTGTGAAGAAGCTGCCCGTCAAGCGGAAGAAATCGCGCGTCAGGCTCG  
TAAGGAAGGCAATTTAGAGTTGGCGCTGAAAGCTTTGCAGATTTAGTAAACGCGGCGTACGTCTTGTGAGATCGCCCGTGA  
CCGCGGCAATGAGGAGCTTTTAGAGAAAAGCGGCACGTCTTGCAGGAGAAAGCTGCGCGTCAGGCAGAAGAAATTCGCGGCCAA  
GCTCGTAAAGAAGGCAACTTGGAGCTTGCATTAAGGCCCTTCAAATCCTGGTCAACGCTGCATATGTTCTGGCAGAAATTGCG

CGCGATCGCGGAAATGAAGAAGTCTTGAGAAAGCAGCGCGCCTTGCTGAGGAAGCAGCCCGCCAGGCGGAGGAGATTGCC  
CGTCAGGCGCGCAAGGAAGGAAGCGCCCCGCTCCCGTTCTTCAACCCCCCACCACAAGTCCGTCAGCTGGACAAGTAC  
AACTTCAAGAAAGCGGCGGTGGGTTGGTTCAGGCGGGCGGCAGCCTTCGTTTGTCTGTGCCGCCTCTGGCCGTACCTTTAGT  
GAGTACGCAATGGGTTGGTTTCGCCAGGCCCTGGTAAGGAACGTGAATTTGTTGCAACTATCTCATGGAGTGGTGGCTCTACT  
TATTACACCCGTTTCAAGTAAAAGGACGTTTCACTATCTCCCGCGACAACGCGAAAAACACCGTCTACTTGCAAATGAATAGCCTG  
AAGCCCGACGATACAGCAGTATATTATTGCGCGGCAGCGGGGTTAGGAACAGTAGTATCAGAGTGGGATTACGACTACGACTA  
TTGGGGACAGGGCACTCAAGTAACAGTGTCAAGCGGACATCATCACCACCAC

**MGNLELALKALQILVNAAYVLAIEIARDRGNEELLEKAARLAEEAARQEEIARQARKEGNLELALKALQILVNAAYVLAIEIARDRGN**  
**EELLEKAARLAEEAARQEEIARQARKEGNLELALKALQILVNAAYVLAIEIARDRGNEELLEKAARLAEEAARQEEIARQARKEG**  
**SAPPPVPSTPPTPSPSA****QQVQLQESGGGLVQAGGSLRLS****CAASGRTFSEYAMGWFRQAPGKEREVATISWSSGGSTYYTRSVKG**  
**RFTISRDNKNTVYLMNSLKPDDTAVYYCAAAGLGTVVSEWDYDYDYWGQGTQVTVSSGHHHHHH**

**Table S2. Binding of trimeric tcTRP Anti-SARS CoV2 VHH domains to SARS RBD**

| CONSTRUCT                                 | <sup>a</sup> Yield (mg/L) | <sup>b</sup> IC50 (nM)            | <sup>c</sup> EC50 (nM)           | <sup>d</sup> K <sub>D</sub> (nM) | <sup>d</sup> k <sub>a</sub> (1/nMs) | <sup>d</sup> k <sub>dis</sub> (1/s) |
|-------------------------------------------|---------------------------|-----------------------------------|----------------------------------|----------------------------------|-------------------------------------|-------------------------------------|
| tcTRP9x <sub>3</sub> _VHH678 <sub>3</sub> | 15.0                      | 1.64<br>(95% CI=<br>1.43 - 1.82)  | 2.06<br>(95% CI=<br>1.79 - 2.34) | 1.90<br>± 0.03                   | 8.23E+04<br>± 1.00E+03              | 1.56E-04<br>± 1.78E-06              |
| tcTRP9x <sub>3</sub> _VHH679 <sub>3</sub> | 17.5                      | 1.41<br>(95% CI=<br>0.85 - 1.82)  | 5.52<br>(95% CI=<br>4.86 - 6.27) | 12.1<br>± 0.41                   | 1.30E+04<br>± 1.82E+02              | 1.57E-04<br>± 4.83E-06              |
| tcTRP9x <sub>3</sub> _VHH680 <sub>3</sub> | 22.5                      | 5.54<br>(95% CI=<br>4.39 - 6.97)  | 8.01<br>(95% CI=<br>6.94 - 9.28) | 3.06<br>± 0.06                   | 1.12E+05<br>± 1.93E+02              | 3.41E-04<br>± 3.58E-06              |
| tcTRP9x <sub>3</sub> _VHH681 <sub>3</sub> | 15.0                      | 0.78<br>(95% CI=<br>0.41 - 1.19)  | 0.64<br>(95% CI=<br>0.51 - 0.78) | 0.43<br>± 0.01                   | 9.40E+04<br>± 7.99E+02              | 3.98E-05<br>± 3.36E-06              |
| tcTRP9x <sub>3</sub> _VHH682 <sub>3</sub> | 77.5                      | 3.11<br>(95% CI=<br>2.47 - 3.70)  | 4.65<br>(95% CI=<br>4.21 - 5.13) | 0.99<br>± 0.04                   | 1.11E+05<br>± 2.32E+03              | 1.10E-04<br>± 4.17E-06              |
| tcTRP9x <sub>3</sub> _VHH683 <sub>3</sub> | 40.0                      | 2.57,<br>(95% CI=<br>2.32 - 2.80) | 2.69<br>(95% CI=<br>2.33 - 3.10) | 1.21<br>± 0.05                   | 7.49E+04<br>± 1.86E+03              | 9.05E-05<br>± 3.32E-06              |
| tcTRP9x <sub>3</sub> _VHH684 <sub>3</sub> | 32.5                      | 2.1<br>(95% CI=<br>1.58 - 2.48)   | 1.89<br>(95% CI=<br>1.59 - 2.25) | 8.37<br>± 0.14                   | 3.99E+04<br>± 2.19E+02              | 3.34E-04<br>± 5.43E-06              |
| tcTRP9x <sub>3</sub> _VHH685 <sub>3</sub> | 32.5                      | 1.02<br>(95% CI=<br>0.72 - 1.29)  | 1.88<br>(95% CI=<br>1.58 - 2.23) | 1.40<br>± 0.02                   | 1.14E+05<br>± 3.96E+02              | 1.59E-04<br>± 1.68E-06              |

See **Figure 8** and **Supplemental Figure S5** for data related to the contents of this table.

Homotrimeric tcTRP9x<sub>3</sub>.VHH<sub>3</sub> constructs are expressed in *E. coli*.

<sup>a</sup> Expression yields are presented in mg/L of culture.

<sup>b</sup> IC50 represents VHH concentration to achieve 50 % inhibition of infection of 293T-Ace2 cells by SARS-CoV-2 spike pseudotyped lentiviruses. The 95% confidence interval indicates the goodness of fit of the non-linear regression. Data is from a single experiment.

<sup>c</sup> ELISA EC50 denotes the VHH concentration required to achieve 50 % binding to SARS-CoV-2 RBD. The data we present are from a single ELISA experiment with experimental replicates. The 95% confidence interval given indicates the goodness of fit of the non-linear regression.

<sup>d</sup> Binding kinetics were measured using Biolayer interferometry (BLI). The rate of association and dissociation are calculated from concentration-dependent responses. The equilibrium dissociation constant (K<sub>D</sub>) is given as a function of the rates of association and dissociation. Reported errors represent one standard deviation of the mean.



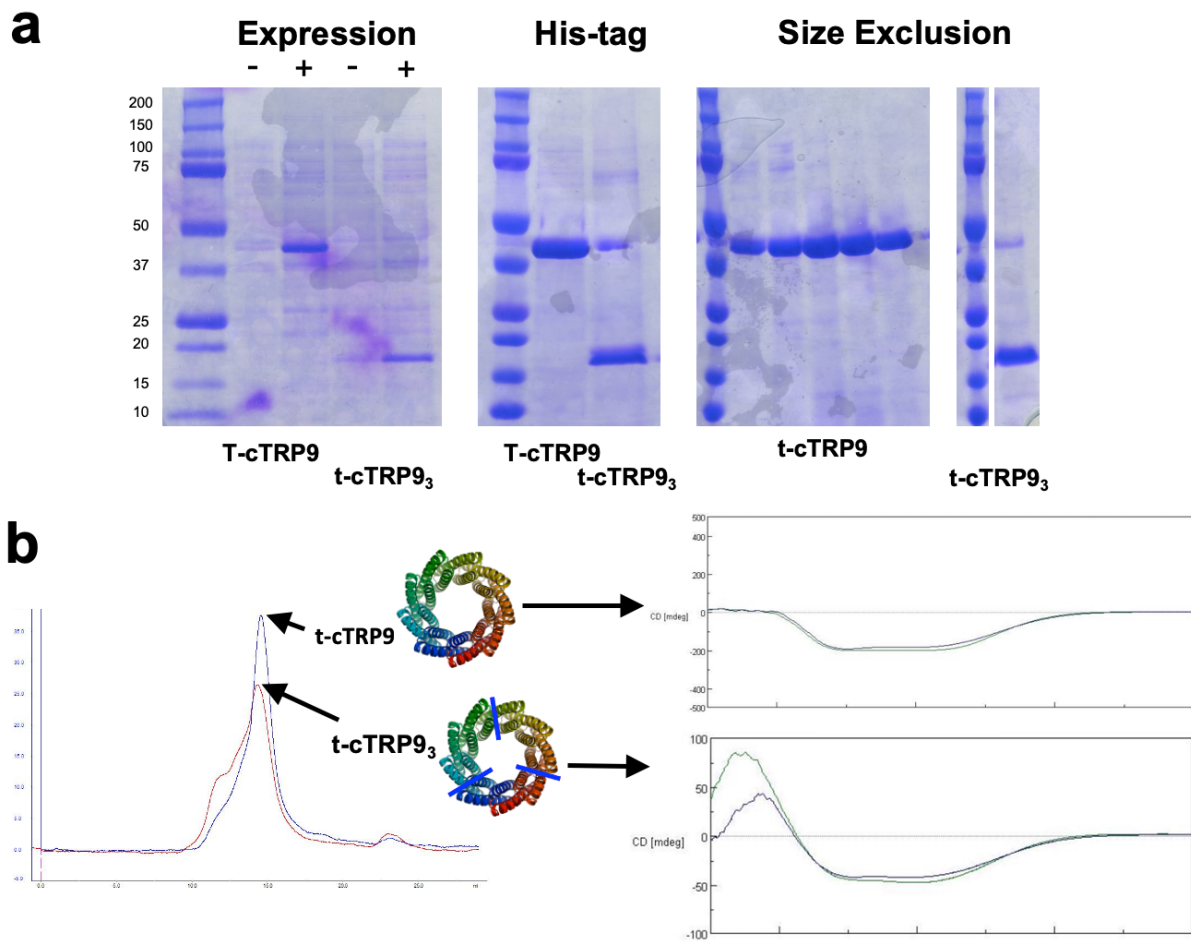

**Supplemental Figure S1 (Related to Figures 1, 3 and 4). Expression and purification of t-cTRP9 and t-cTRP9<sub>3</sub>.** *Panel a:* Induction and expression of each construct (left gel) was followed by affinity chromatography via an N-terminal polyhistidine tag (middle gel) and then size exclusion chromatography ('SEC'; right gels). *Panel b:* SEC elution of t-cTRP9 and t-cTRP9<sub>3</sub>. Both constructs elute at approximately the same retention volume; the trimeric construct (t-cTRP9<sub>3</sub>) elutes slightly faster and with a preceding shoulder that may reflect dynamic sampling of a transient 'open' or partially dissociated complex with a larger average hydrodynamic radius during the column run. Right: Circular Dichroism (CD) spectra of the two constructs collected at 22° C and 95°C are extremely similar, indicating retention of structure at the higher temperature.

**a**

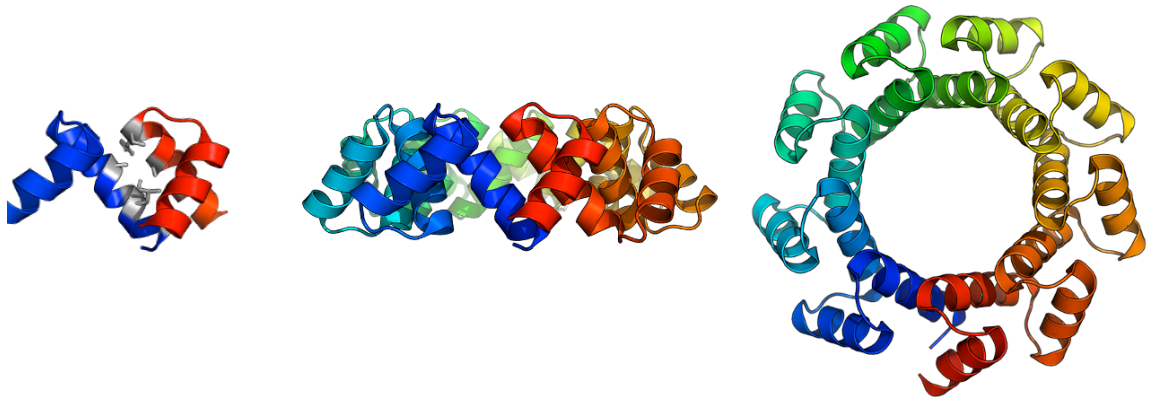

**b**

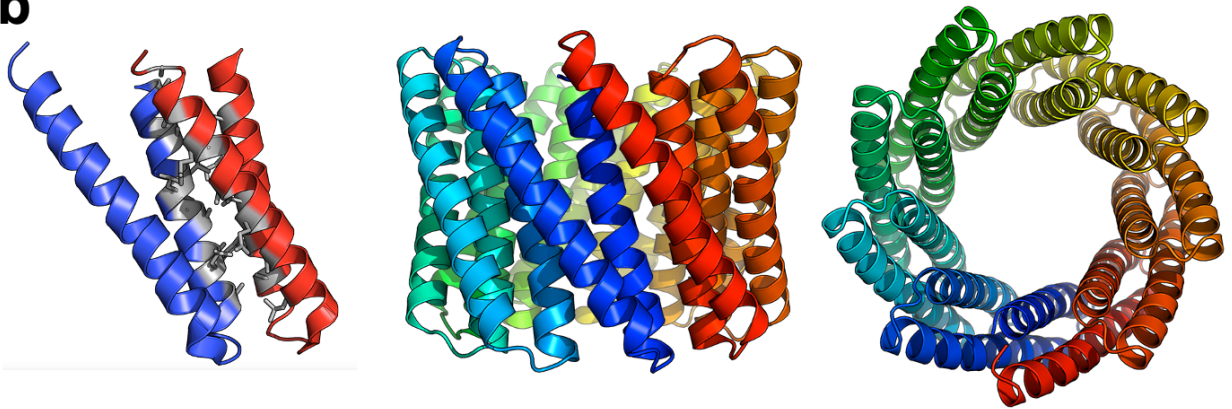

**Supplemental Figure S2 (related to Figures 1, 3 and 4). Comparison of the dimensions and topology of a 9 repeat 'cTRP' (circular Tandem Repeat Protein as described in<sup>13</sup>) compared to a comparable 9 repeat 'tcTRP' (thick circular Tandem Repeat Protein) described in this study. Both structures are colored from blue at the N-terminal first repeat to red at the C-terminal last (ninth) repeat. The individual repeats have been converted from left-handed two-helix bundles (with each helix composed of 4 turns) to longer right-handed two-helix bundles (with each helix composed of 8 turns).**

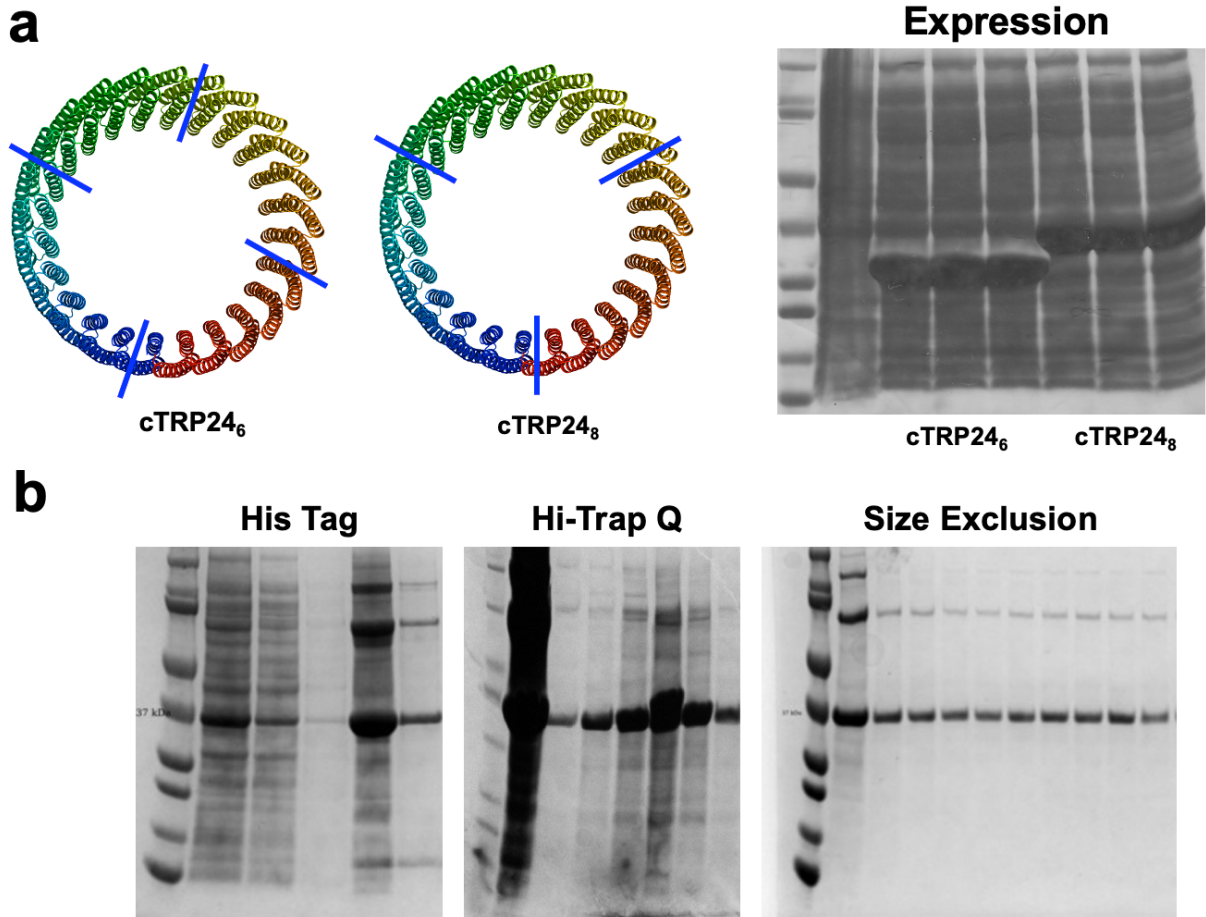

**Supplemental Figure S3 (related to Figure 5). Expression of tcTRP24<sub>6</sub> and tcTRP24<sub>8</sub> and purification of tcTRP24<sub>8</sub>.** *Panel a*: Induction of both constructs, which are each illustrated to the right. Both constructs are designed to form an assemblage corresponding to a tcTRP containing 24 total repeats; the first (tcTRP24<sub>6</sub>) via tetramerization and the second (tcTRP24<sub>8</sub>) via trimerization. *Panel b*: Purification of tcTRP24<sub>8</sub>. The protein was purified in a three-step process corresponding to affinity chromatography via an N-terminal polyhistidine tag (left gel), ion exchange chromatography over a Hi-TrapQ column (middle gel) then size exclusion chromatography ('SEC'; right gel). The upper band on the fractions corresponding to the SEC elution corresponds to persistent folded protein after SDS-PAGE analysis; this behavior is often seen for highly thermostable proteins designed using the *RosettaDesign* software package.

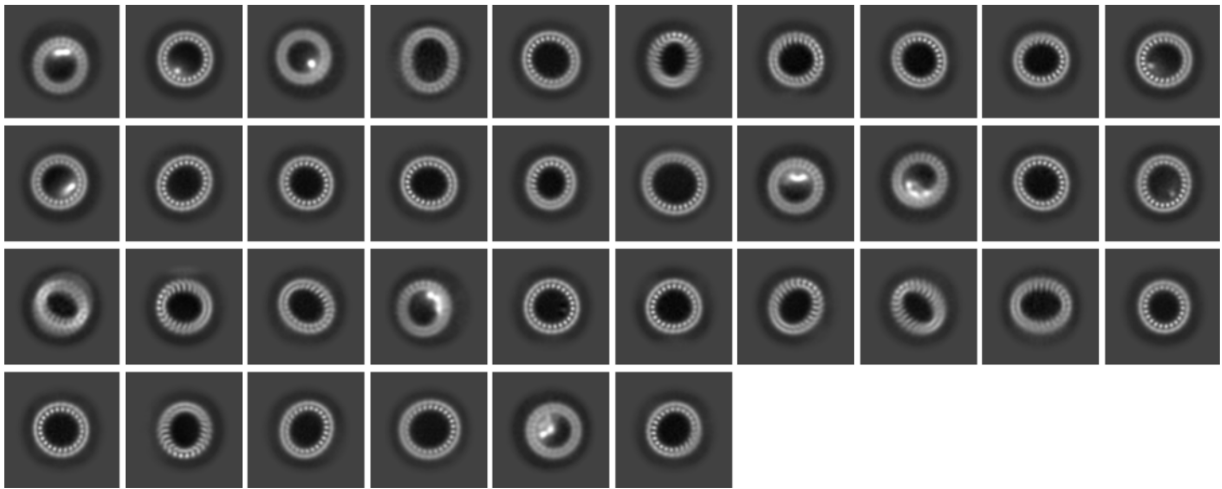

**Supplemental Figure S4 (Related to Figure 6). 2-D projections of tcTRP24<sub>8</sub>SS used for CryoEM reconstruction (Figure 5) validates the overall design and dimensions of that construct.**

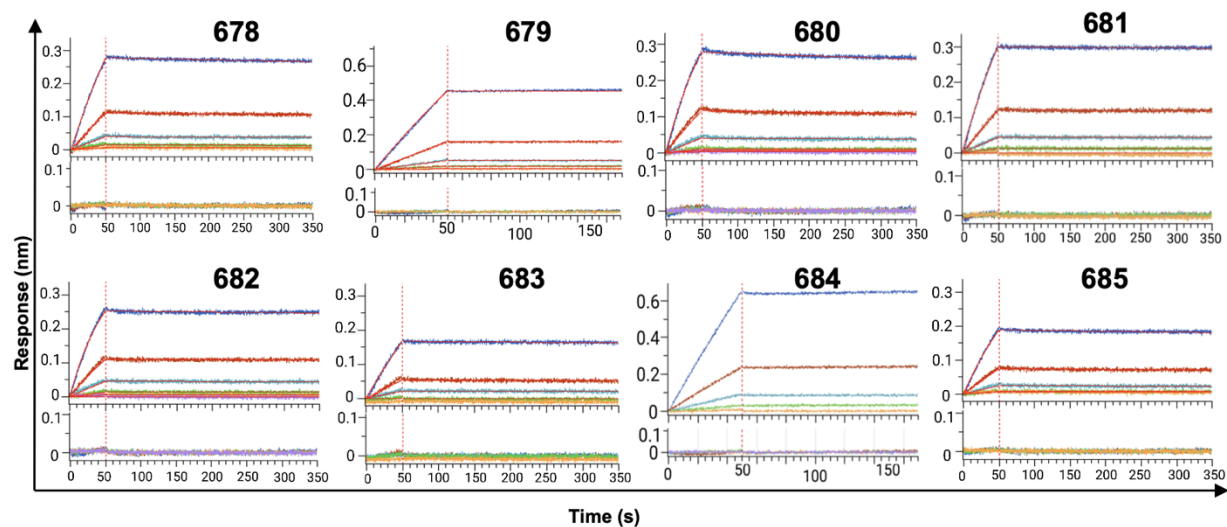

**Supplemental Figure S5 (Related to Figure 8 and Supplemental Table S2). Representative binding sensorgrams for determination of kinetics of binding interactions and equilibrium dissociation constants ( $K_D$ ) for the interaction between homotrimeric tcTRP9<sub>3</sub>-VHH<sub>3</sub> constructs and SARS-CoV2 RBD.**

BLI sensorgrams of the eight trimeric versions of SARS-CoV-2 targeting VHH, VHH 72, recorded at pH 7.2 were assayed for binding to the SARS CoV2 spike receptor binding domain (RBD) immobilized on a streptavidin biosensor. The apparent equilibrium binding constant ( $K_D$ ) for each construct are determined from the rate of association ( $k_a$ ), and rate of dissociation ( $k_{dis}$ ) using the protocol described in the methods section. The rate of  $k_a$  and  $k_d$  are calculated from concentration-dependent responses. Values of  $K_D$ ,  $k_a$  and  $k_d$  are indicated in **Supplemental Table S2**; dissociation constants ranged from 0.4 nM (construct 681) to 8.4 nM (construct 684). Kinetic analysis was performed using the HT 11.1.1.39 Data Analysis module (ForteBio). Results were double referenced. Both association and dissociation steps were used in 1:1 binding model Global data fitting model. The response sensorgrams for association and dissociation phases of the analysis and corresponding fit are given for each interaction. The residuals of the fits are plotted below the respective sensorgrams.
